# Supplementary material for: Unveiling the Chemical Composition of Sulfur-Fumigated Herbs: A Triple Synthesis Approach Using UHPLC-LTQ-Orbitrap MS—A Case Study on Steroidal Saponins in Ophiopogonis Radix
Source: MDPI journal article supplement (doi:10.3390/molecules29030702), 2024-02-02
Supplement: s1 [file s1]

# Supplement

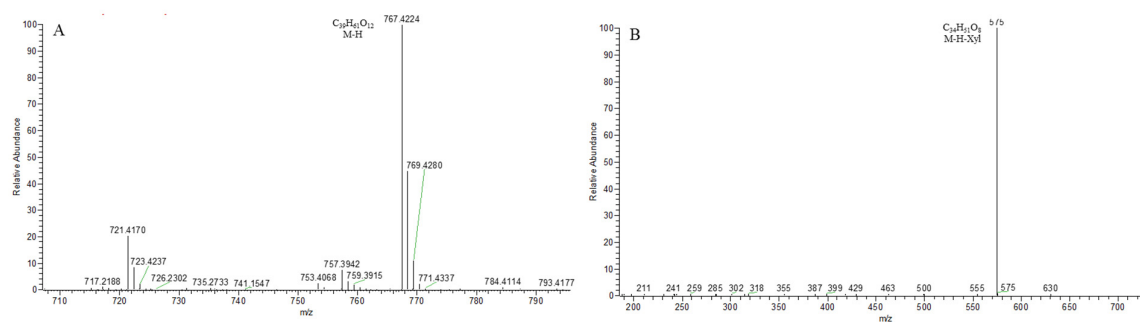

**Figure S1.** The ESI-MS spectrum (A) and ESI-MS/MS spectrum (B) of ophiopogonin B in negative ion mode.

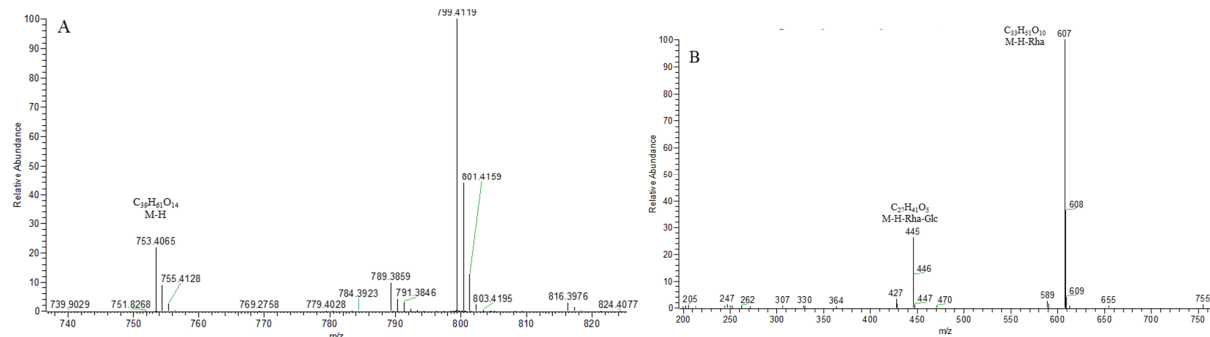

**Figure S2.** The ESI-MS spectrum (A) and ESI-MS/MS spectrum (B) of Ophiogenin 3-O- $\alpha$ -L-rha-(1 $\rightarrow$ 2)- $\beta$ -D-gluc in negative ion mode.

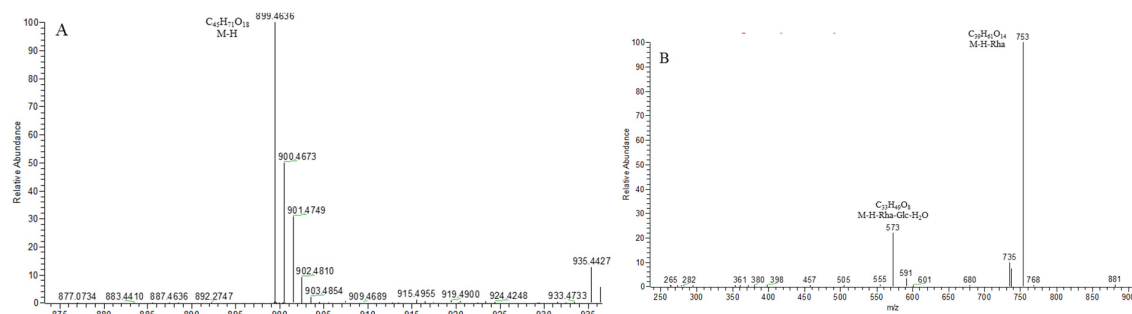

**Figure S3.** The ESI-MS spectrum (A) and ESI-MS/MS spectrum (B) of (20R,25R)-26-O- $\beta$ -D-gluc-3 $\beta$ ,26-dihydroxycholest-5-en-16,22-dioxo-3-O- $\alpha$ -L-rha(1 $\rightarrow$ 2)- $\beta$ -D-Glc in negative ion mode.

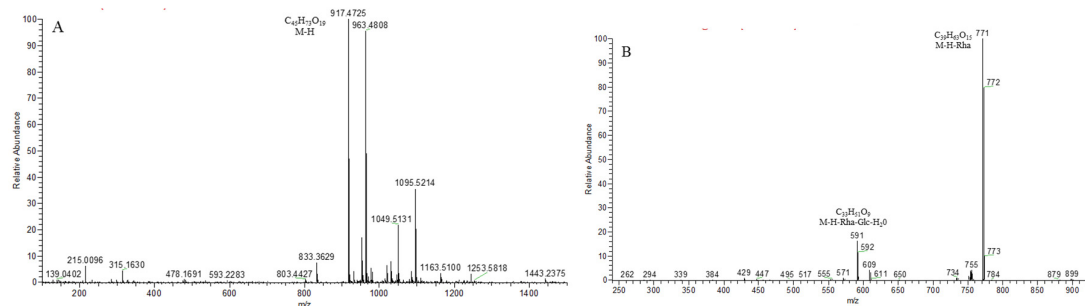

**Figure S4.** The ESI-MS spectrum (A) and ESI-MS/MS spectrum (B) of Ophiofursipside M in negative ion mode.

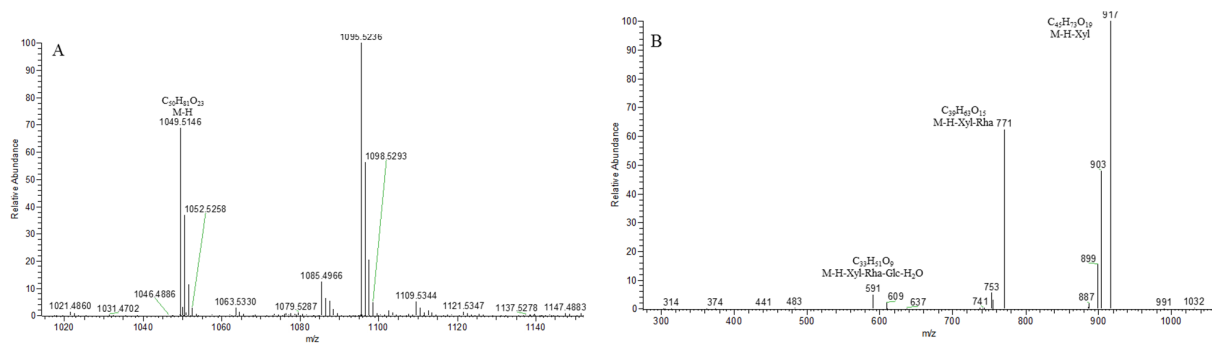

**Figure S5.** The ESI-MS spectrum (A) and ESI-MS/MS spectrum (B) of Xyl-Ophiofurspiside M in negative ion mode.

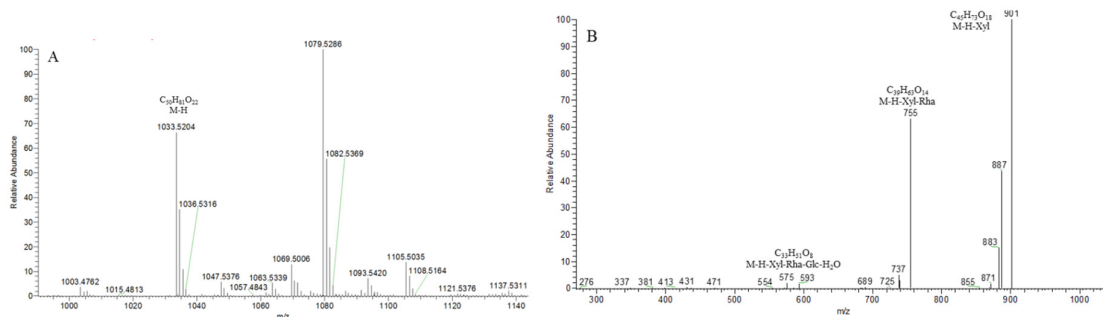

**Figure S6.** The ESI-MS spectrum (A) and ESI-MS/MS spectrum (B) of Ophiofurspiside A in negative ion mode.

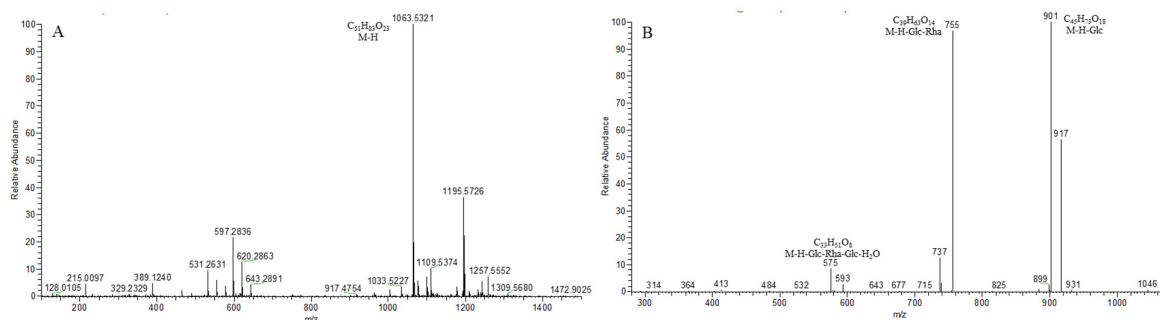

**Figure S7.** The ESI-MS spectrum (A) and ESI-MS/MS spectrum (B) of Ophiopogonin H in negative ion mode.

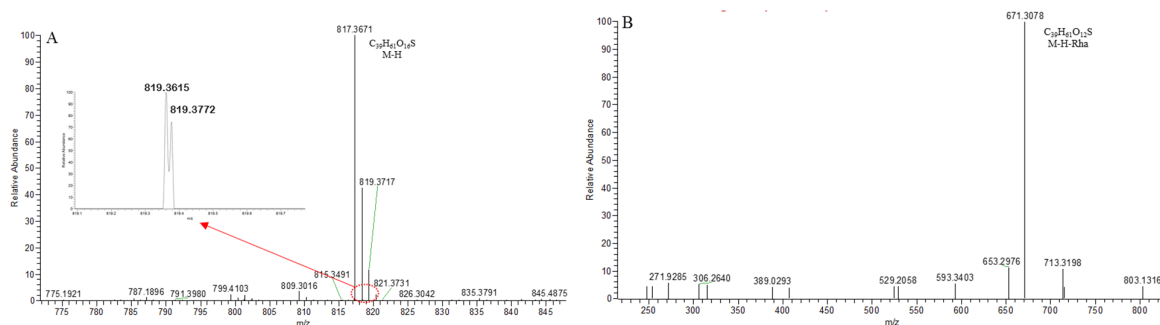

**Figure S8.** The ESI-MS spectrum (A) and ESI-MS/MS spectrum (B) of SS10-SS14 in negative ion mode.

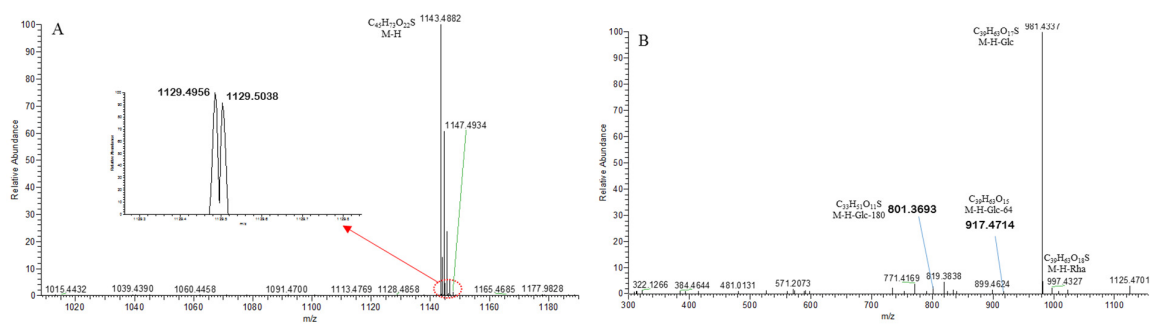

**Figure S9.** The ESI-MS spectrum (A) and ESI-MS/MS spectrum (B) of SS72-SS74 in negative ion mode.
